# Supplementary material for: Prevalence of Neurodevelopmental Disorders Among Low-Income African Americans at a Clinic on Chicago’s South Side
Source: Atypon-hosted journal article supplement (doi:10.1176/appi.ps.201400162), 2015-03-02
Supplement: appi.ps.201400162.ds001.pdf [file appi.ps.201400162.ds001.pdf]

**Standard set of psychiatric interview questions to explore the possibility of the patient having a childhood Neurodevelopmental disorder**

- 1) Patient reports or clinician observes that patient is “slow.”
- 2) How far did you go in school? Did you have learning problems in school?
- 3) If the patient did not finish grammar or high school ask: Why didn't you finish grammar school/high school?
- 4) Were you in special education classes?
- 5) Did you have problems learning – math, reading, or comprehension?
- 6) How is your memory?
- 7) If the patient reports having a poor memory ask: Has your memory been poor since childhood?
- 8) Do serial 7subtractions from 100.
- 9) Three-item recall test for memory.
- 10) Clock drawing test.
- 11) Spell “world” forwards and backwards.
- 12) Did you have a bad temper as a child/have you had a bad temper your whole life?
- 13) Did you have poor emotional control as a child/have you had poor emotional control your whole life?
- 14) Did the teachers and adults in your family think you were hyperactive? Were you diagnosed with ADHD?
- 15) Did you have speech or language problems in school? Does the patient have signs of receptive speech problems in the interview, e.g. do you have to ask each question twice before the patient “gets” the question?
- 16) Were you teased as a child? If the patient was teased, ask the patient: What were you teased about?
- 17) Have you ever had a job? Get an employment history, e.g. what is the longest time you have held a job? Do you get along comfortably in life? Is the mother still needed to help take care of the patient?
- 18) Did you have any problems when you were first born? Premature? Low birth weight? Heart murmur? Strabismus?
- 19) Do you know if your mother might have been drinking while she was pregnant with you? If yes – How do you know? Grandmother's report? Father's report? Older sibs of mothers report?
- 20) Did anyone ever tell you that your eyes looked Asian/Chinese? Are you the only one in your family with those features?
